# Supplementary material for: Theoretical and Experimental Study of Different Side Chains on 3,4-Ethylenedioxythiophene and Diketopyrrolopyrrole-Derived Polymers: Towards Organic Transistors
Source: MDPI journal article supplement (doi:10.3390/ijms25021099), 2024-01-16
Supplement: s1 [file s1]

# Supplementary Materials

Figure S1. GPC for the polymers P1 (left) and P2 (right).

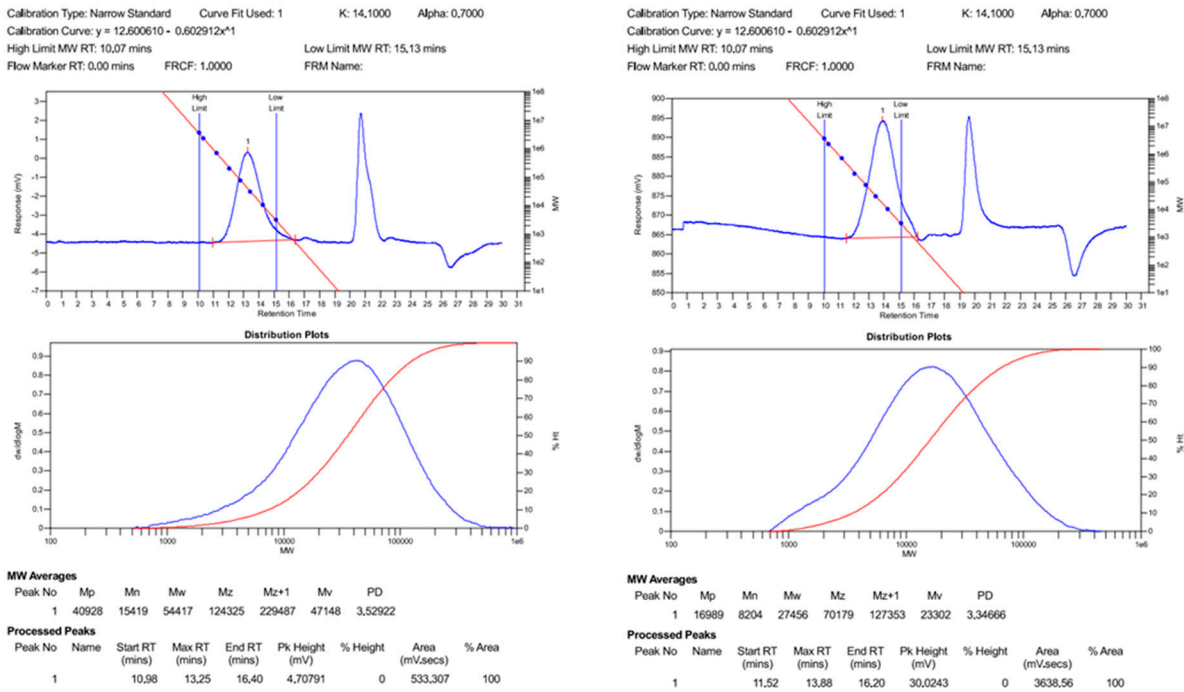

Figure S2. DSC curve of the polymers P1 and P2.

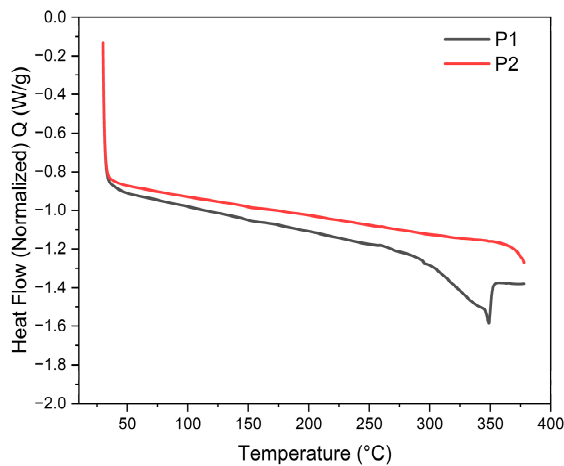

**Figure S3.** The orbital of HOMO-1, LUMO+1, HOMO-2, and LUMO+2 of the dimer.

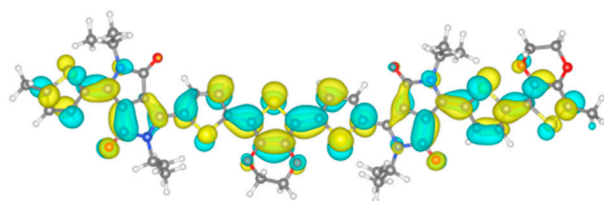

LUMO+2

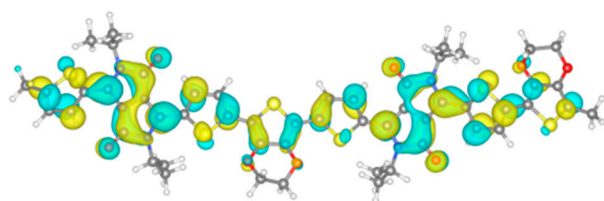

LUMO+1

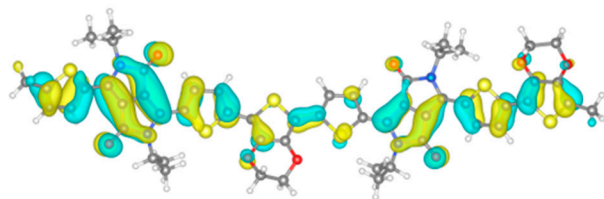

HOMO-1

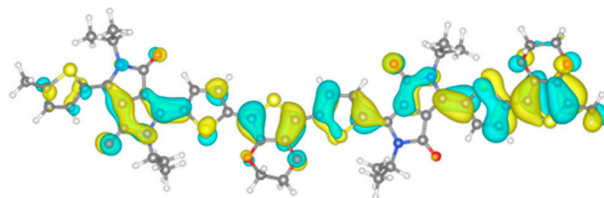

HOMO-2

**Figure S4.** Theoretically modelled UV absorption characteristic curves for dimer.

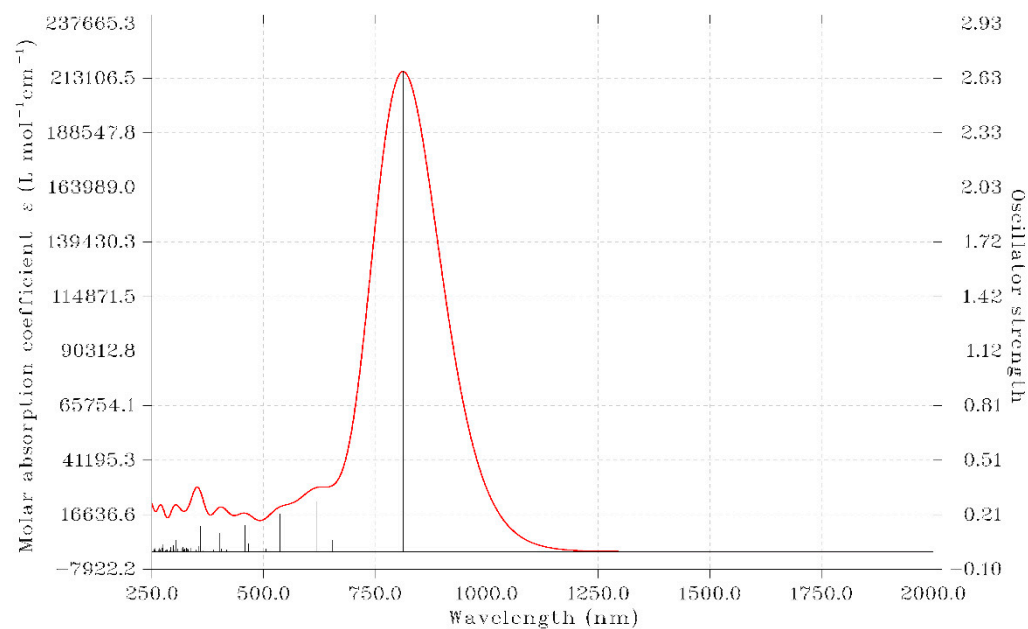

**Figure S5.** The device configuration of BG/BC OFET.

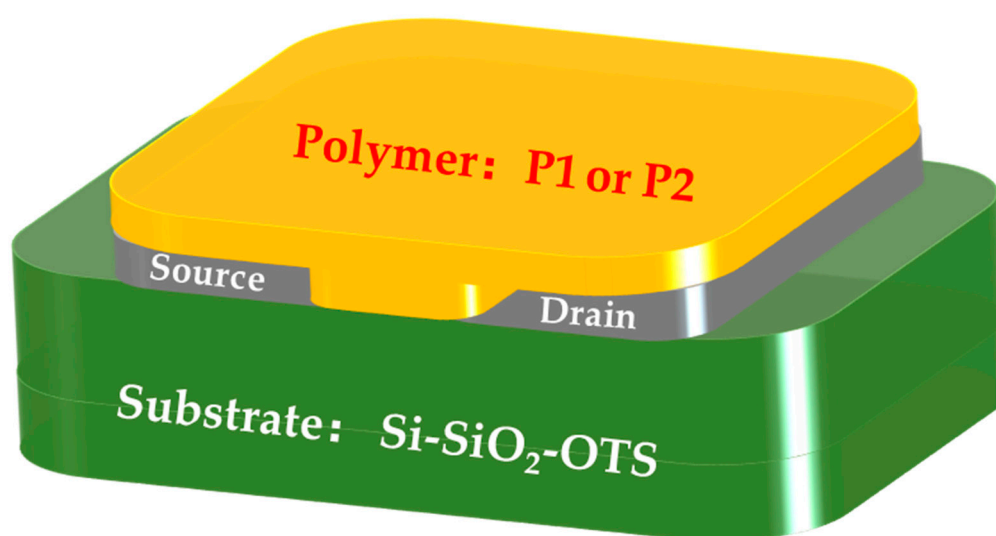

**Figure S6.** The 3D topography of the polymers P1 (left) and P2 (right).

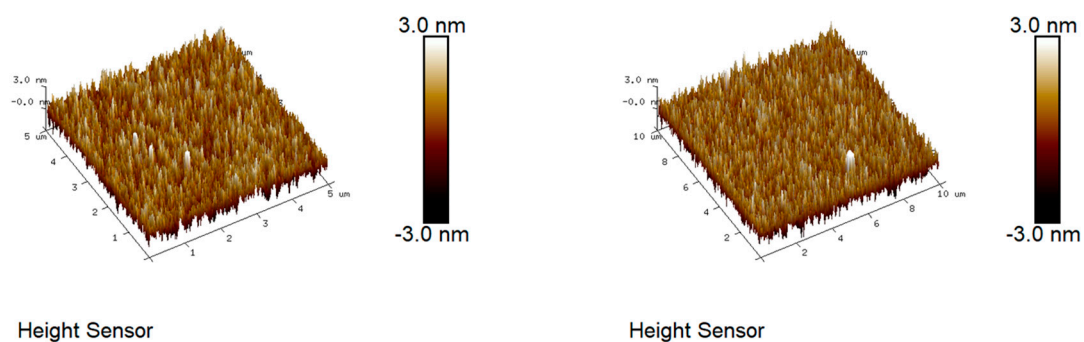

**Table S1.** Space atomic coordinates of the dimer.

|   |             |             |             |
|---|-------------|-------------|-------------|
| C | -8.73605899 | -0.45369890 | -0.29507601 |
| C | -7.32904897 | -0.39878691 | -0.59663301 |
| C | -6.74327594 | 0.58302408  | -1.39939601 |
| C | -5.34485096 | 0.48918207  | -1.48565201 |
| C | -4.81118997 | -0.55763293 | -0.73655301 |
| S | -6.08292199 | -1.43630592 | 0.08163699  |
| C | -3.43555797 | -0.93112194 | -0.59084201 |
| S | -2.14711496 | -0.03413995 | -1.38694801 |
| C | -0.90242597 | -1.07454296 | -0.70503101 |
| C | -1.48138298 | -2.05323296 | 0.09236899  |
| C | -2.90112098 | -1.97246795 | 0.15692999  |

|   |              |             |             |
|---|--------------|-------------|-------------|
| O | -0.77971399  | -3.00046897 | 0.74884099  |
| C | -1.59110200  | -4.09537896 | 1.20933299  |
| C | -2.87193799  | -3.58589995 | 1.83815999  |
| O | -3.64254199  | -2.83331794 | 0.88410499  |
| C | 0.48613603   | -0.87479398 | -0.99821801 |
| C | 1.06493404   | 0.10463002  | -1.80206801 |
| C | 2.46452903   | 0.01066901  | -1.87966901 |
| C | 3.00219302   | -1.05211699 | -1.15058001 |
| S | 1.71583102   | -1.92566599 | -0.33168701 |
| C | 4.41387902   | -1.29963200 | -1.00740001 |
| N | -9.47177698  | -1.51736889 | 0.23843799  |
| C | -10.83334698 | -1.12448388 | 0.48513399  |
| C | -10.89969199 | 0.25720612  | 0.05734999  |
| C | -9.61905398  | 0.62536711  | -0.44316201 |
| C | 5.41390002   | -0.34175601 | -1.22245901 |
| C | 6.67991802   | -0.88993602 | -0.87731201 |
| C | 6.47237102   | -2.26544602 | -0.47858801 |
| N | 5.05424402   | -2.46894901 | -0.58444501 |
| C | -11.71539194 | 1.39027812  | 0.12807899  |
| N | -10.97949297 | 2.46094912  | -0.38209501 |
| C | -9.65432597  | 2.04090511  | -0.74876301 |
| O | -11.67807600 | -1.89704288 | 0.91914999  |

|   |              |             |             |
|---|--------------|-------------|-------------|
| O | -8.83661896  | 2.80307910  | -1.25187601 |
| C | -9.16278501  | -2.95455290 | 0.36489399  |
| C | -11.39257992 | 3.81580012  | -0.79454501 |
| C | -13.04857195 | 1.40281413  | 0.68584199  |
| C | -13.86267198 | 0.28140914  | 0.78710999  |
| C | -15.08114199 | 0.52108015  | 1.46977899  |
| C | -15.21672094 | 1.81664615  | 1.92060999  |
| S | -13.82135393 | 2.76272514  | 1.49147899  |
| O | 7.24438601   | -3.16287703 | -0.15552201 |
| C | 4.57087000   | -3.85780700 | -0.46474001 |
| C | 5.60124706   | 1.06441099  | -1.51101601 |
| N | 7.00217906   | 1.30030998  | -1.29570901 |
| C | 7.64866703   | 0.12802397  | -0.88870701 |
| O | 4.83581505   | 1.93728299  | -1.90361201 |
| C | 7.52514706   | 2.61216397  | -1.72267901 |
| C | 9.02074104   | -0.05005304 | -0.49547301 |
| S | 10.13314303  | 1.21406995  | 0.01833099  |
| C | 11.39653303  | 0.05843094  | 0.36997099  |
| C | 10.95863905  | -1.23743405 | 0.10487899  |
| C | 9.63694202   | -1.29776505 | -0.36625101 |
| C | -8.57307998  | -3.56057390 | -0.90877301 |
| C | -8.41164097  | -3.29119290 | 1.65468999  |

|   |              |             |             |
|---|--------------|-------------|-------------|
| C | -12.68777496 | 3.83266313  | -1.60585001 |
| C | -11.34026493 | 4.82142712  | 0.35676799  |
| C | 3.76347000   | -4.32308000 | -1.67666501 |
| C | 3.93085400   | -4.15076900 | 0.89386799  |
| C | 8.64698508   | 2.50819996  | -2.75626801 |
| C | 7.79914904   | 3.55588097  | -0.54972901 |
| C | 12.67393602  | 0.48134793  | 0.86762599  |
| C | 13.10856403  | 1.76853192  | 1.14340898  |
| C | 14.45103004  | 1.82863491  | 1.63992399  |
| C | 15.05460904  | 0.59715891  | 1.74753599  |
| S | 13.95804104  | -0.66703608 | 1.23783199  |
| O | 12.35089207  | 2.87014693  | 0.96047499  |
| C | 12.88067709  | 4.04777393  | 1.59338099  |
| C | 14.37976109  | 4.13820492  | 1.38885499  |
| O | 15.04262207  | 3.00676591  | 1.96568499  |
| C | -16.35196492 | 2.42883616  | 2.67515099  |
| C | 16.43267106  | 0.30053290  | 2.23614999  |
| H | -7.33240898  | 1.36091909  | -1.88290801 |
| H | -4.73113395  | 1.16840707  | -2.07914801 |
| H | -1.81460400  | -4.76107995 | 0.35815199  |
| H | -0.99144000  | -4.64329296 | 1.94754199  |
| H | -3.50233100  | -4.42423794 | 2.16147799  |

|   |              |             |             |
|---|--------------|-------------|-------------|
| H | -2.64931298  | -2.94377095 | 2.70756899  |
| H | 0.48297604   | 0.86966003  | -2.31840801 |
| H | 3.09276904   | 0.71081001  | -2.42791201 |
| H | -10.16602298 | -3.38569889 | 0.48511999  |
| H | -10.58175692 | 4.09954211  | -1.47947501 |
| H | -13.56085899 | -0.68893686 | 0.39656599  |
| H | -15.84700995 | -0.23926385 | 1.63136399  |
| H | 5.51344201   | -4.42184801 | -0.47634701 |
| H | 6.65626608   | 3.03507398  | -2.24477001 |
| H | 11.58625904  | -2.11718706 | 0.25403199  |
| H | 9.11082504   | -2.22567004 | -0.58774201 |
| H | -8.58208001  | -4.65793190 | -0.81844301 |
| H | -9.18426997  | -3.28675790 | -1.78264101 |
| H | -7.53698301  | -3.25381091 | -1.10164701 |
| H | -8.34999802  | -4.38513491 | 1.76773499  |
| H | -7.38713299  | -2.89679891 | 1.68052199  |
| H | -8.95361999  | -2.88901190 | 2.52422599  |
| H | -12.64841396 | 3.08346613  | -2.41162301 |
| H | -13.58387894 | 3.64423814  | -1.00062301 |
| H | -12.80336695 | 4.82455713  | -2.06968001 |
| H | -11.52096493 | 5.83629911  | -0.03125201 |
| H | -12.08863390 | 4.62356013  | 1.13598899  |



|   |              |             |             |
|---|--------------|-------------|-------------|
| H | -10.34534695 | 4.80838511  | 0.82735999  |
| H | 4.30192500   | -4.09165600 | -2.60869801 |
| H | 3.63492099   | -5.41526498 | -1.62089601 |
| H | 2.76295700   | -3.87542199 | -1.73497401 |
| H | 3.73292999   | -5.23091400 | 0.98041599  |
| H | 4.61724300   | -3.86430300 | 1.70526699  |
| H | 2.97960501   | -3.62520099 | 1.05165499  |
| H | 8.35006607   | 1.83595796  | -3.57614701 |
| H | 8.83055607   | 3.50586096  | -3.18468101 |
| H | 9.59640107   | 2.14730195  | -2.34043301 |
| H | 6.90379909   | 3.63821598  | 0.08534399  |
| H | 8.63693907   | 3.23753296  | 0.08454299  |
| H | 8.03647709   | 4.55980897  | -0.93585001 |
| H | 12.37307205  | 4.90632693  | 1.13455999  |
| H | 12.63861508  | 4.01783093  | 2.66988999  |
| H | 14.61561109  | 4.19656991  | 0.31098599  |
| H | 14.77803806  | 5.03118291  | 1.88896499  |
| H | -17.13266096 | 1.67427116  | 2.84853099  |
| H | -16.02707996 | 2.81897116  | 3.65412899  |
| H | -16.80223594 | 3.26963516  | 2.12154399  |
| H | 17.01005505  | 1.23456990  | 2.29499799  |
| H | 16.42204502  | -0.15600510 | 3.24115799  |

|   |             |             |            |
|---|-------------|-------------|------------|
| H | 16.96322805 | -0.39371010 | 1.56486899 |
|---|-------------|-------------|------------|
